# Supplementary material for: Biomimetic, self-coacervating adhesive with tough underwater adhesion for ultrafast hemostasis and infected wound healing
Source: Royal Society of Chemistry journal article supplement (doi:10.1039/d3bm01391j), 2023-01-01
Supplement: d3bm01391j6.pdf [file d3bm01391j6.pdf]

## Supporting Information

### Biomimetic Self-coacervation Adhesive with Tough Underwater Adhesion for Ultrafast Hemostasis and Infected Wound Healing

Tingwu Liu,<sup>a,b</sup> Wen Sun,<sup>a,b</sup> Xu Zhang,<sup>a</sup> Donghua Xu,<sup>a</sup> Mingzhe Wang,<sup>a</sup> Qiuyan Yan,<sup>\*,a</sup> Jinghua Yin,<sup>a</sup> and Shifang Luan,<sup>a,b</sup>

<sup>a</sup> *State Key Laboratory of Polymer Physics and Chemistry, Changchun Institute of Applied Chemistry, Chinese Academy of Sciences, Changchun 130022, P. R. China*

<sup>b</sup> *University of Science and Technology of China, Anhui 230026, P. R. China*

\* Corresponding author.

E-mail address: [gyyan@ciac.ac.cn](mailto:gyyan@ciac.ac.cn)

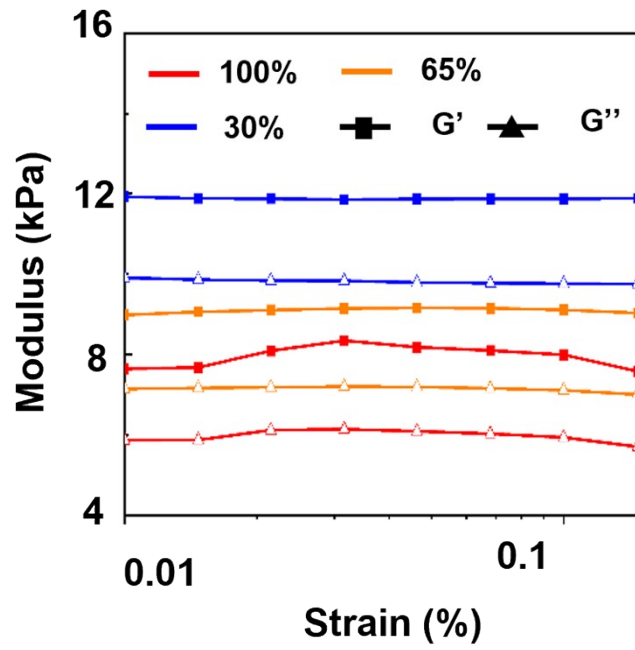

Figure S1. Storage modulus ( $G'$ ) and loss modulus ( $G''$ ) of d-PGA/LZM with different hydration ratio.

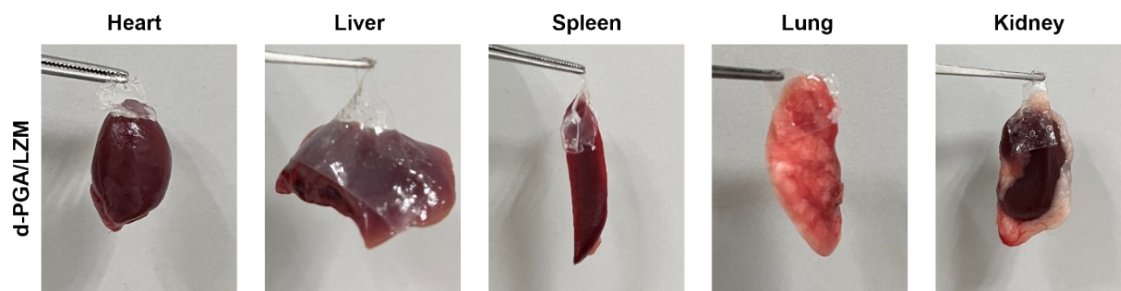

Figure S2. Wet adhesion properties of d-PGA/LZM in rat fresh organs or tissues.

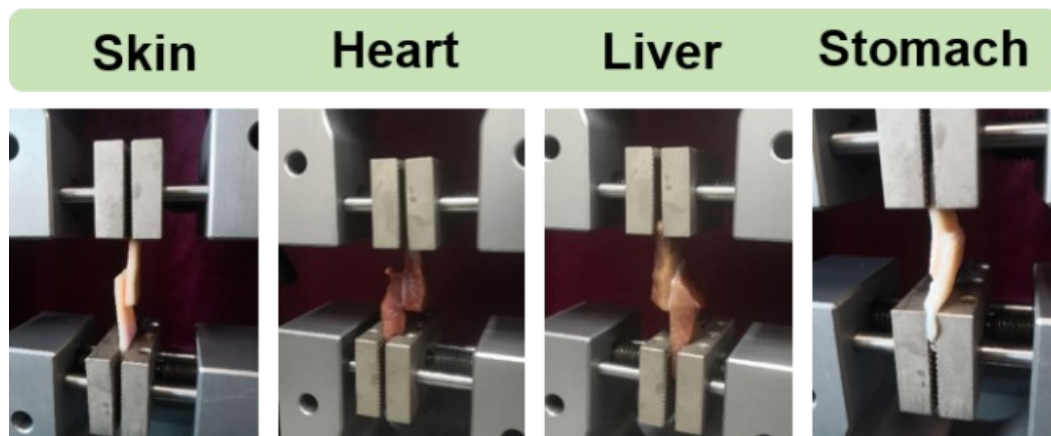

**Figure S3.** Photographs showing strong adhesions of the d-PGA/LZM adhesives with different soft tissue (porcine skin, heart, liver and stomach).

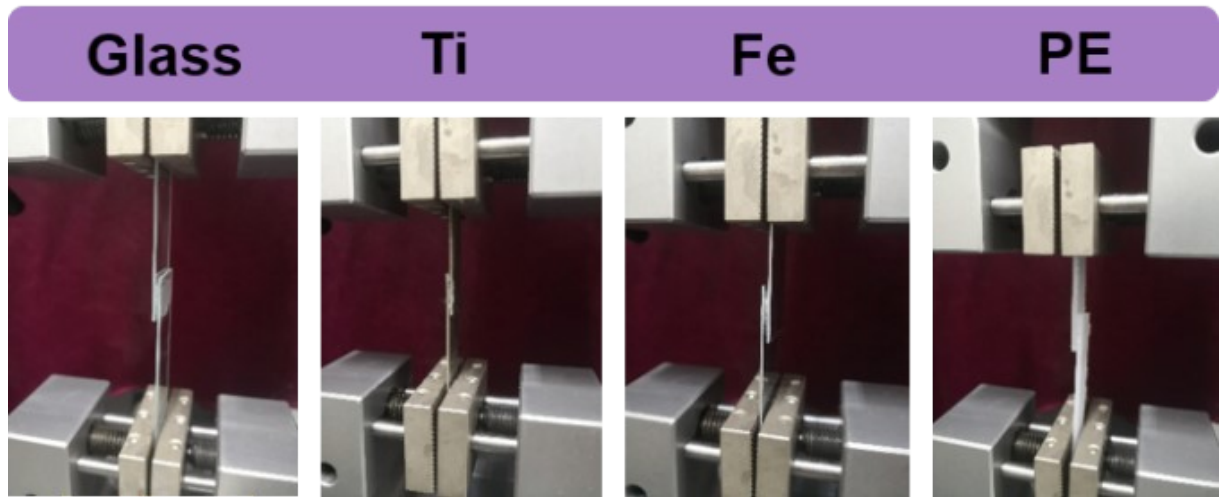

**Figure S4.** Photographs showing strong adhesions of the d-PGA/LZM adhesives with different hard substrate (Glass, Ti, Fe and PE).

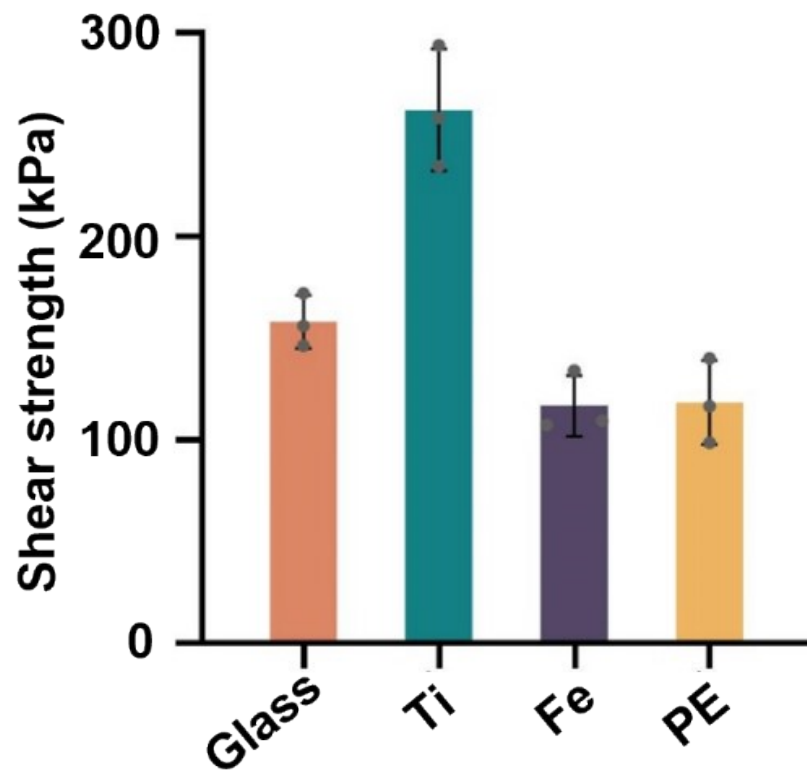

Figure S5. Adhesion strength of d-PGA/LZM adhesives on various substrate.

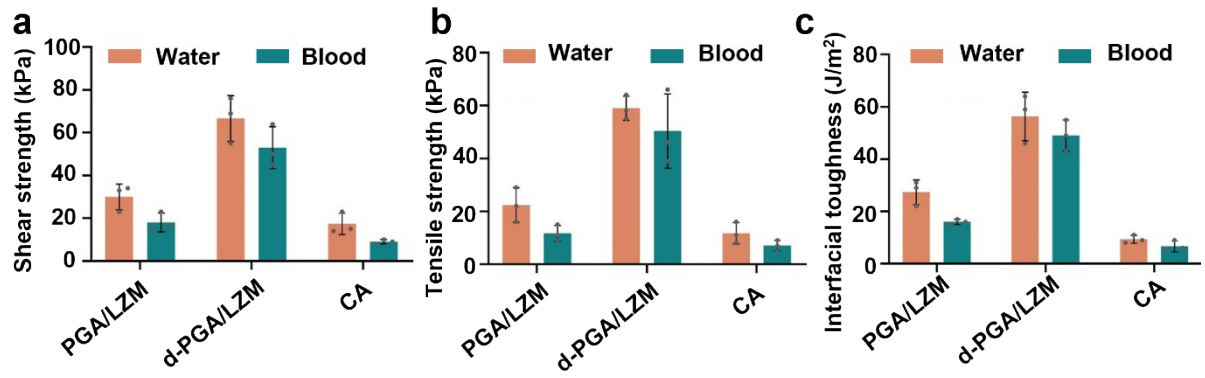

Figure S6. Lap-shear strength, tensile strength, and interfacial toughness of d-PGA/LZM on wet pig skin.

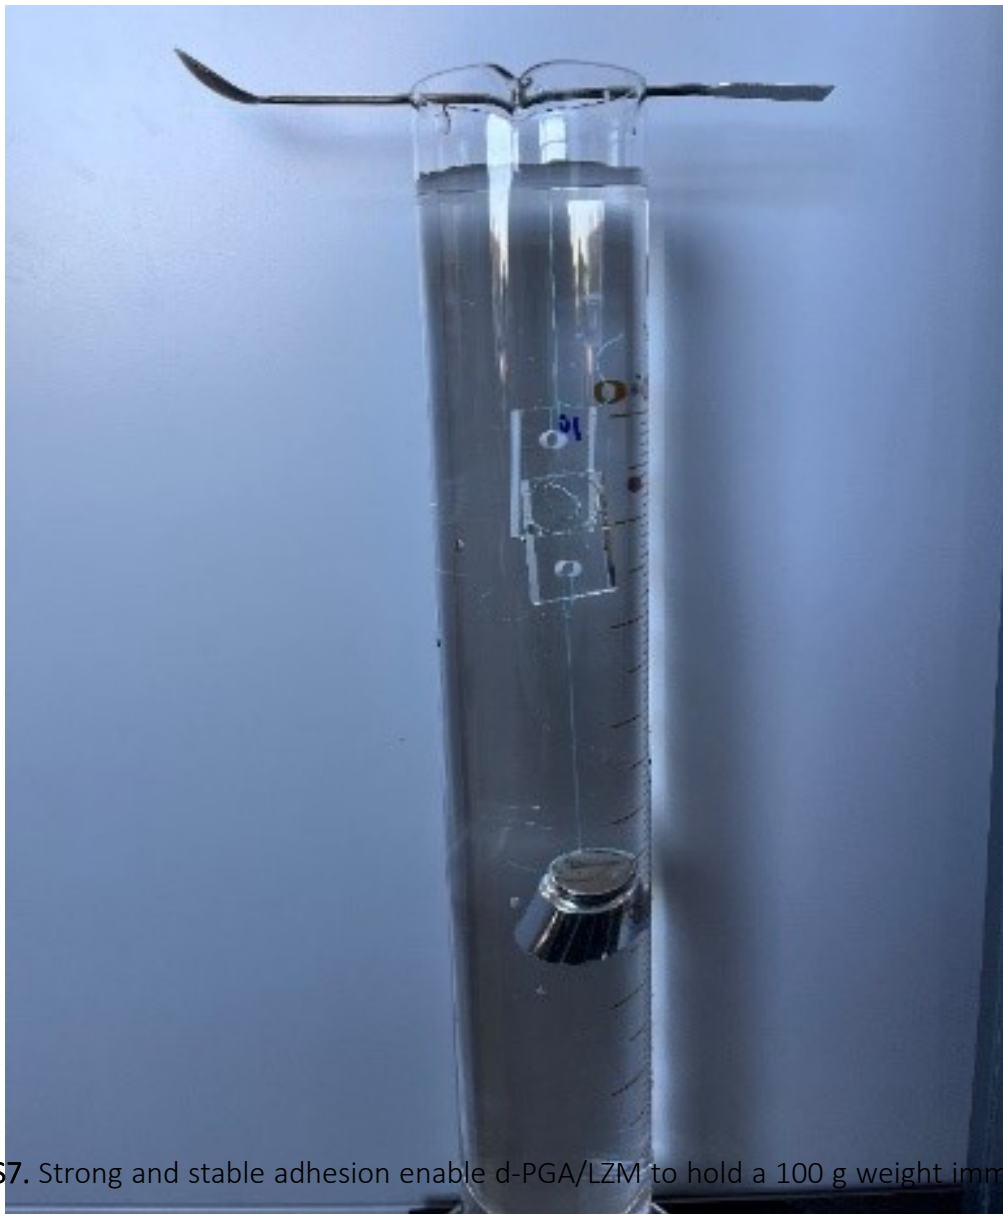

Figure S7. Strong and stable adhesion enable d-PGA/LZM to hold a 100 g weight immersed in

water for 7 days.

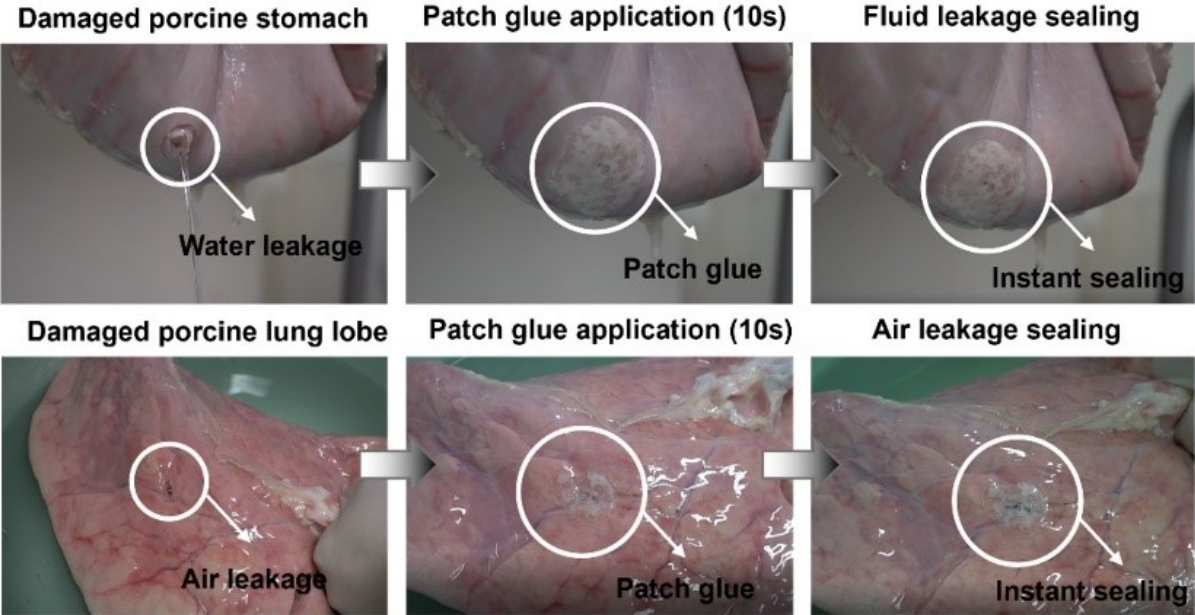

Figure S8. Sealing of a water-leaking porcine stomach and an air-leaking porcine lung using d-PGA/LZM adhesive.



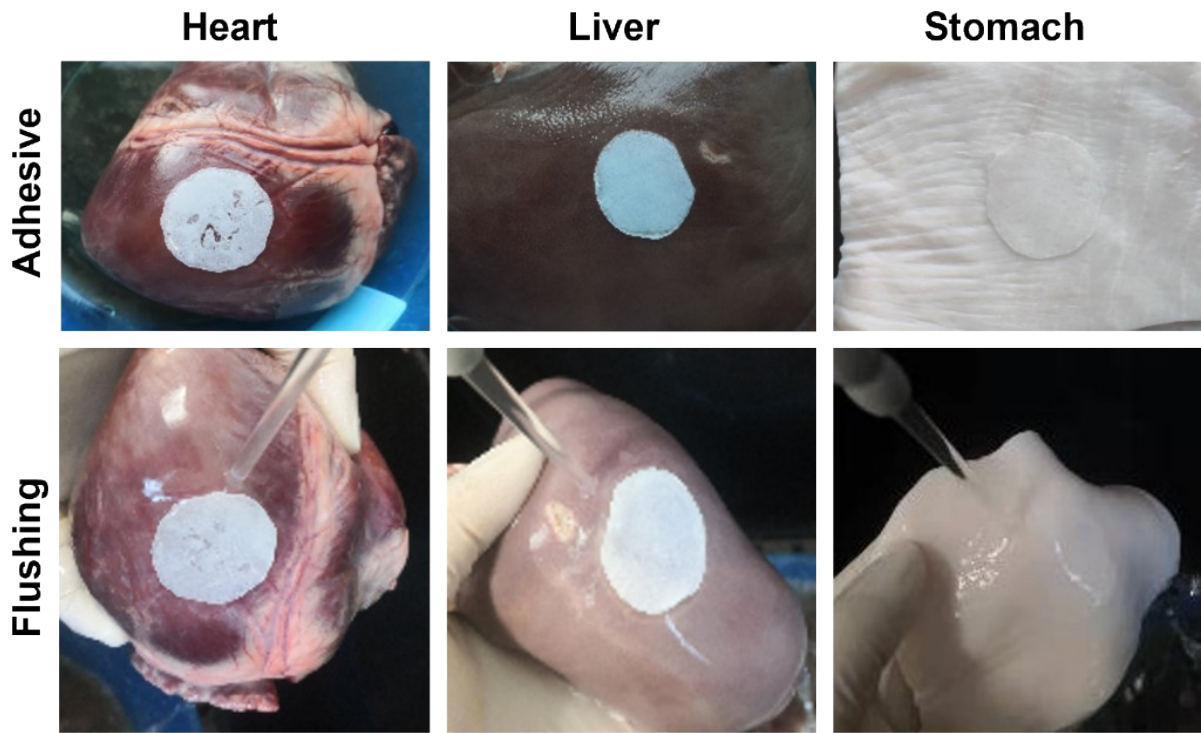

Figure S9. Porcine heart, liver and stomach adhered by d-PGA/LZM adhesive and withstand water impact.

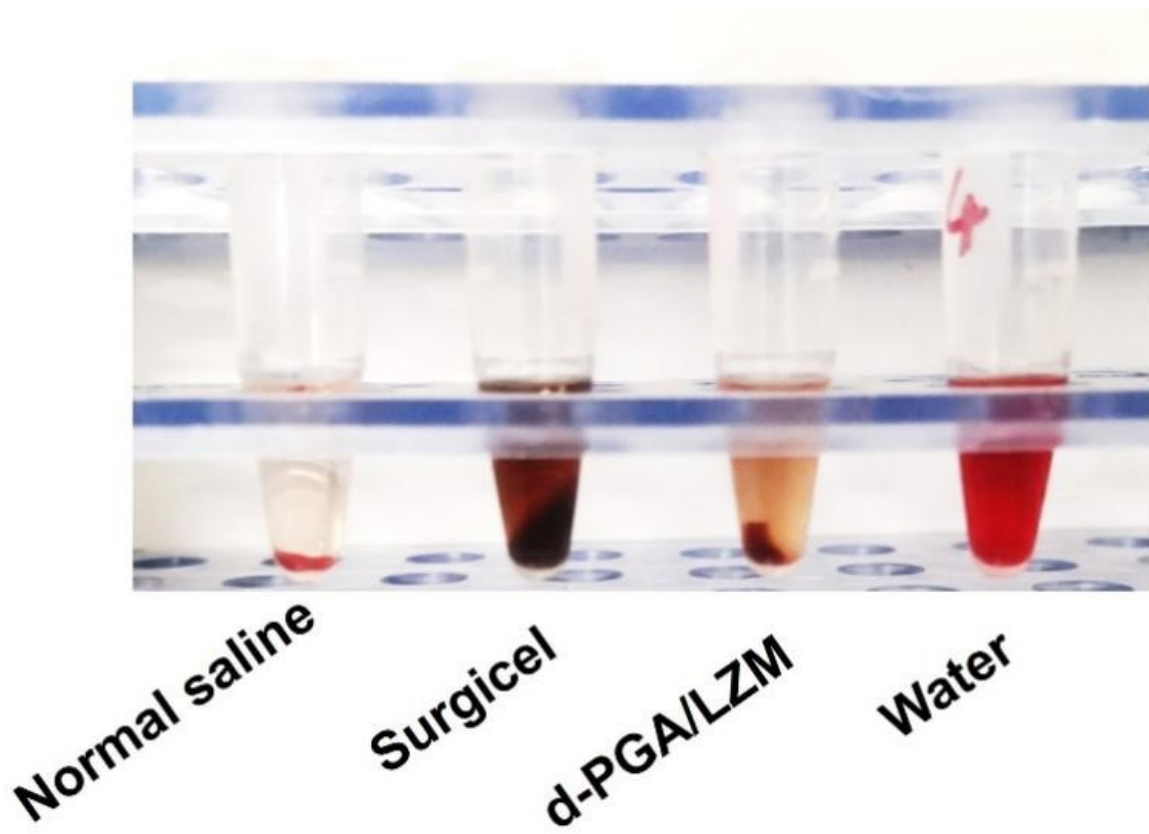

Figure S10. Optical images of hemocompatibility of surgical and d-PGA/LZM.

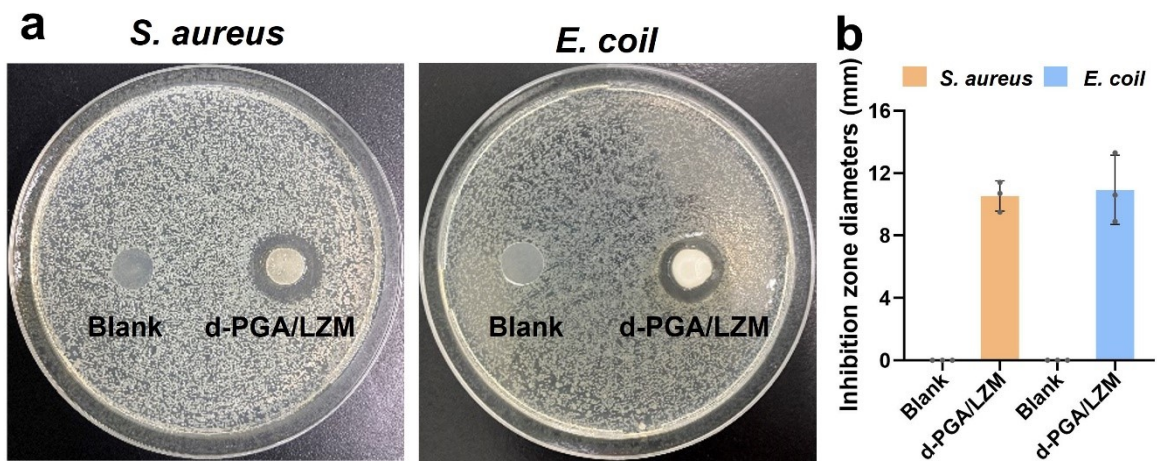

**Figure S11.** a) Zone of inhibition test for antimicrobial activity and b) quantitative antibacterial results of PE thin film and d-PGA/LZM against *E. coli* and *S. aureus*.

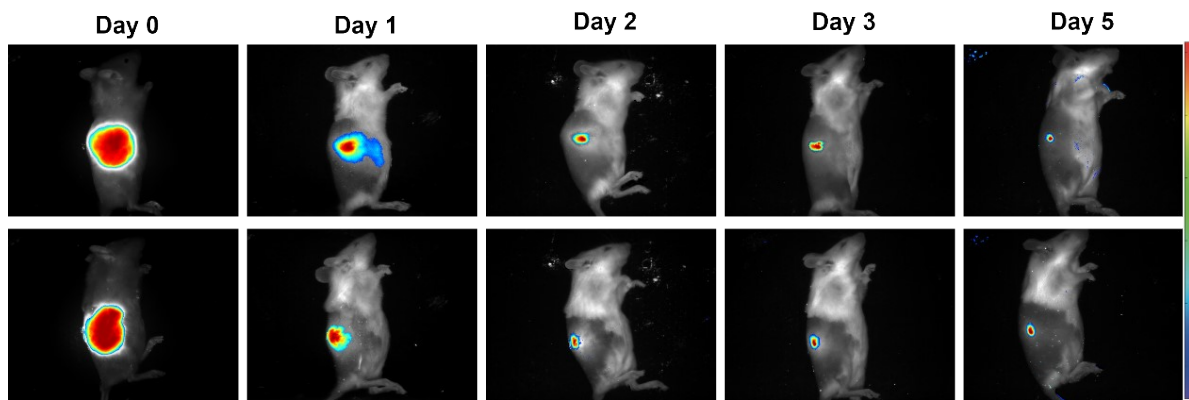

Figure S12. Pictures of the *in vivo* imaging showing the *in vivo* degradation of d-PGA/LZM labeled by FITC on the subcutaneous muscle.

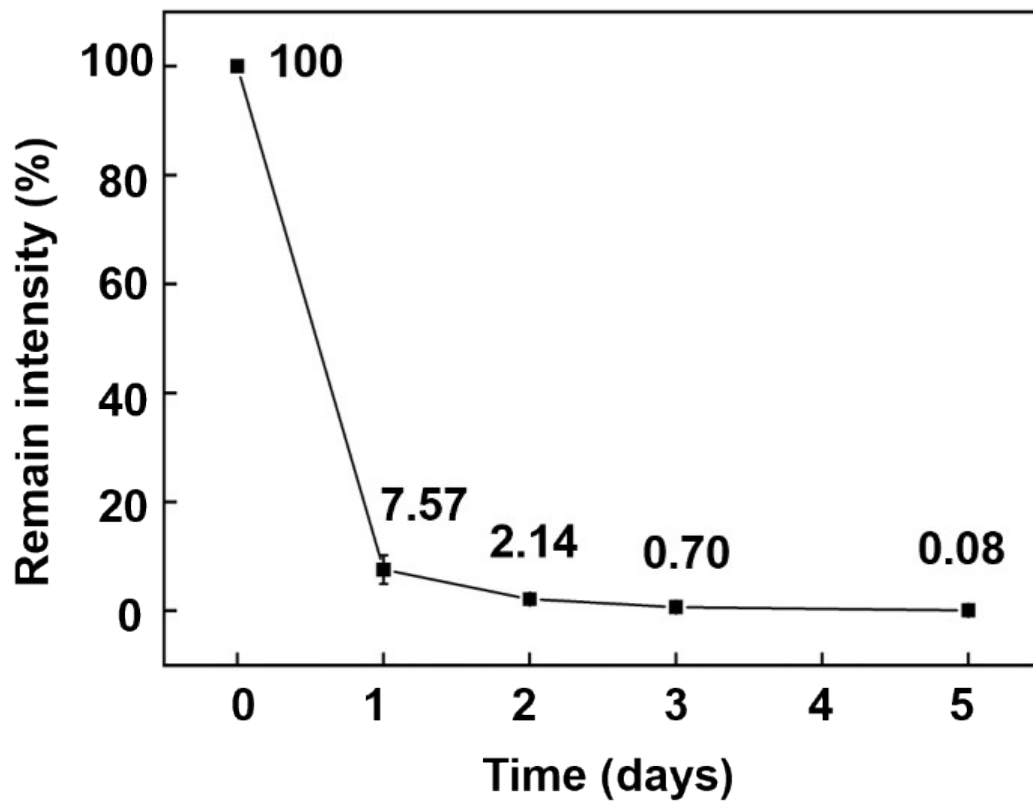

Figure S13. Time-dependent *in vivo* imaging showing the *in vivo* degradation of d-PGA/LZM adhesive labeled by FITC on the subcutaneous muscle.

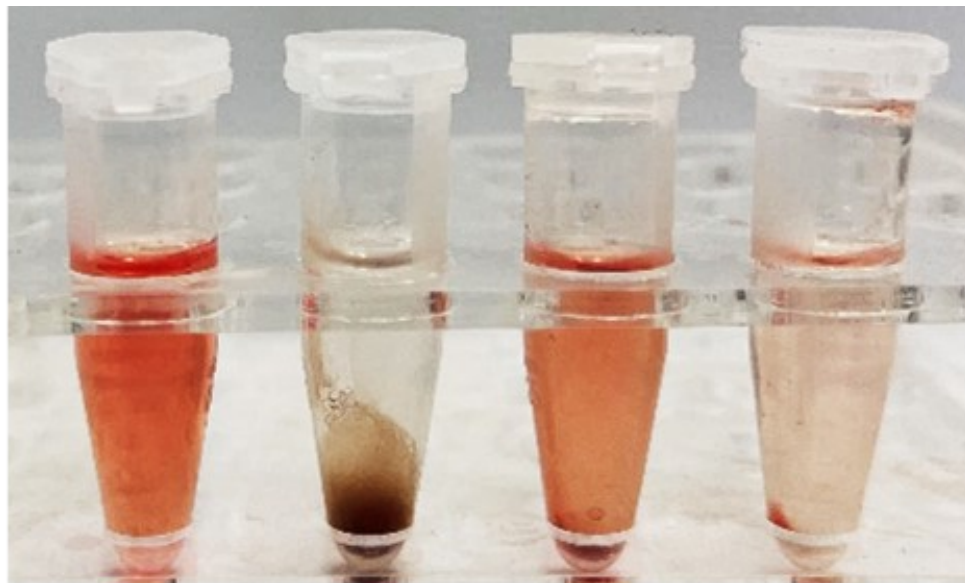

**Control**  
**Surgicel**  
**CA**  
**d-PGA/LZM**

Figure S14. Photographs of blood clotting at 150 s.

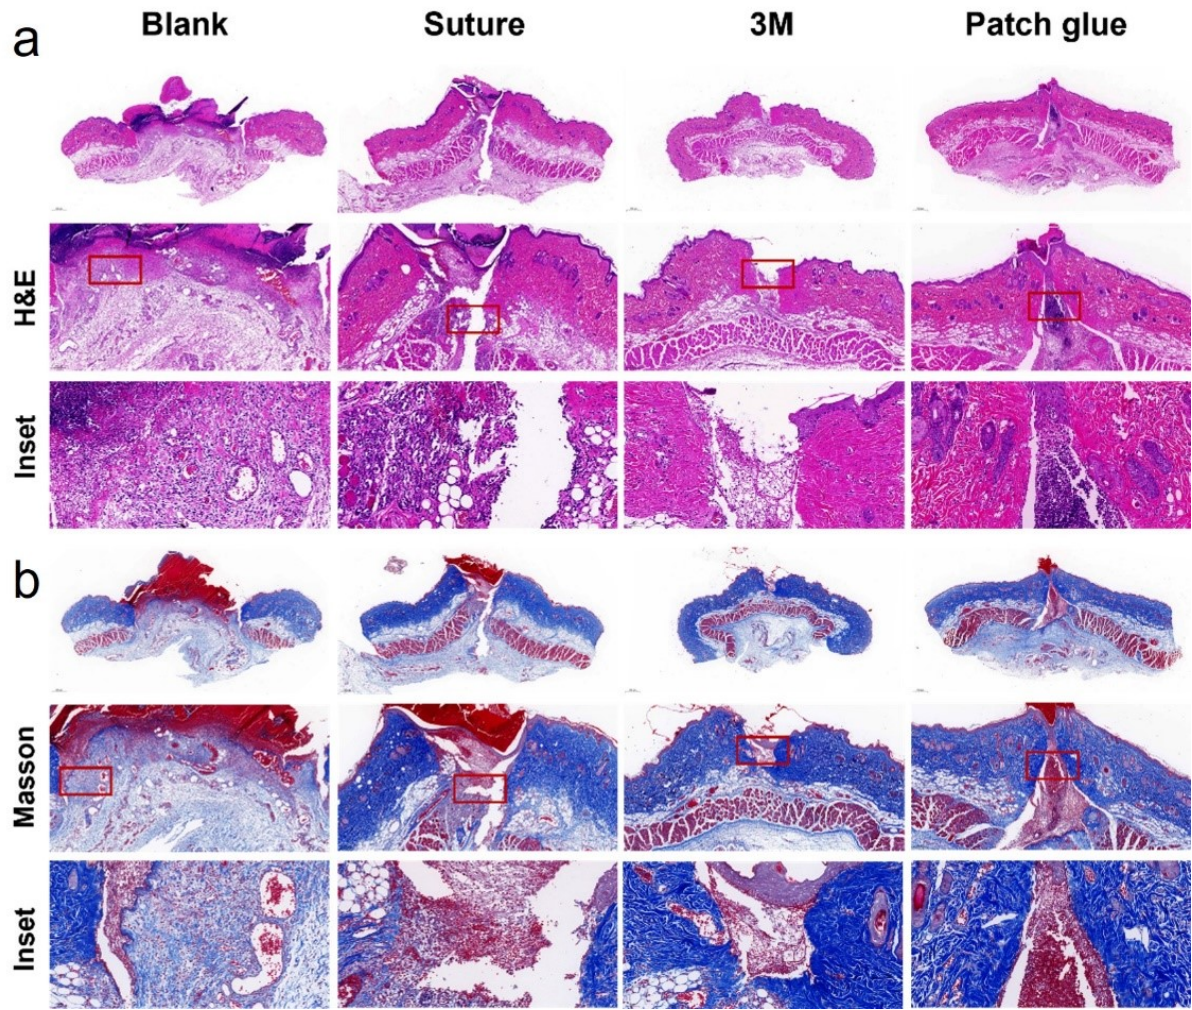

Figure S15. a, b) Histological analysis of the wounds stained with H&E (a) and Masson (b) on day 3.

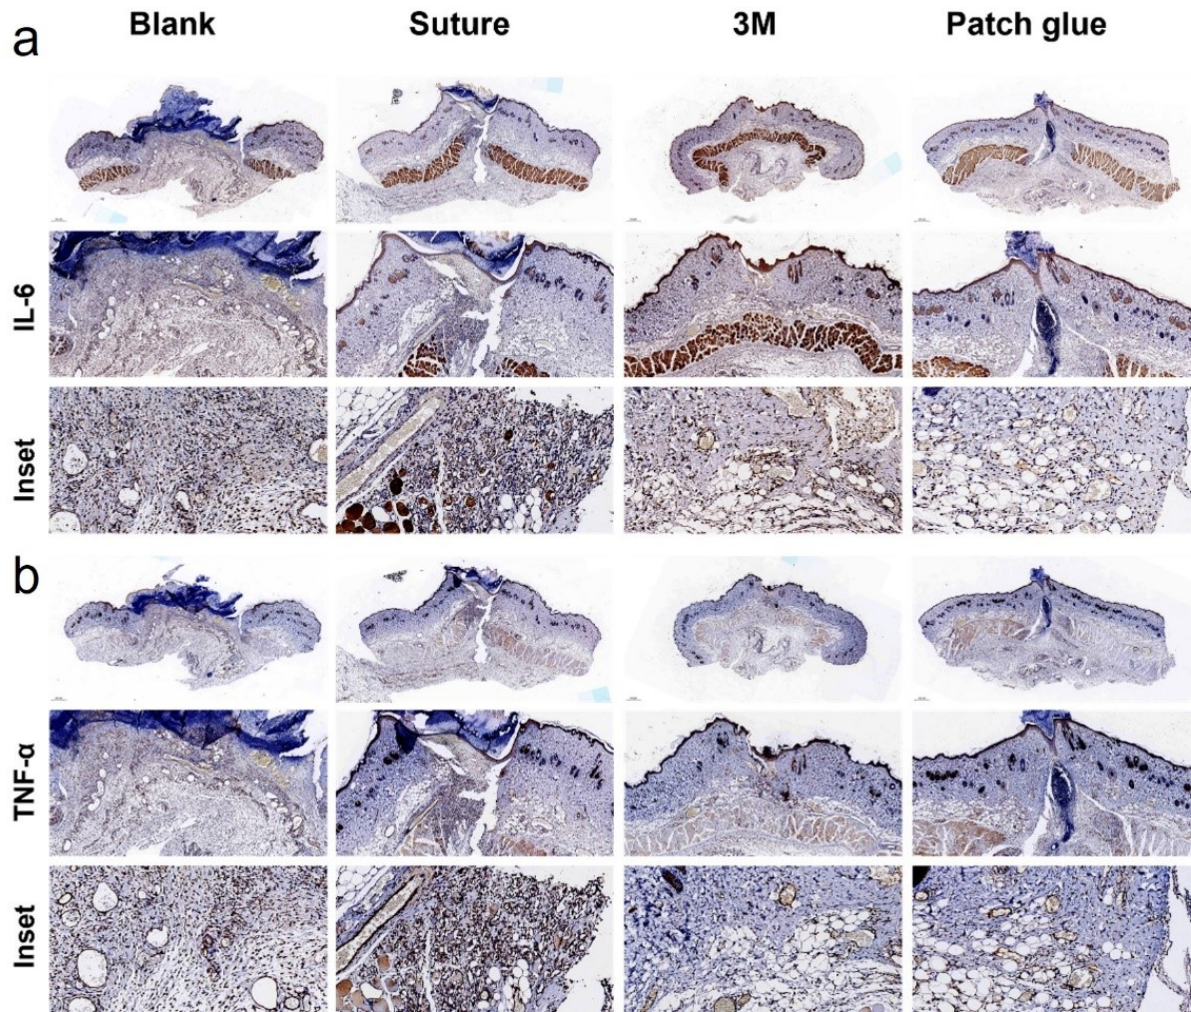

Figure S16. h, j) Immunohistochemical staining of IL-6 (h) and TNF- $\alpha$  (j) at wound sites on day 3. Yellow arrowheads indicate the positive TNF- $\alpha$  and IL-6 staining.



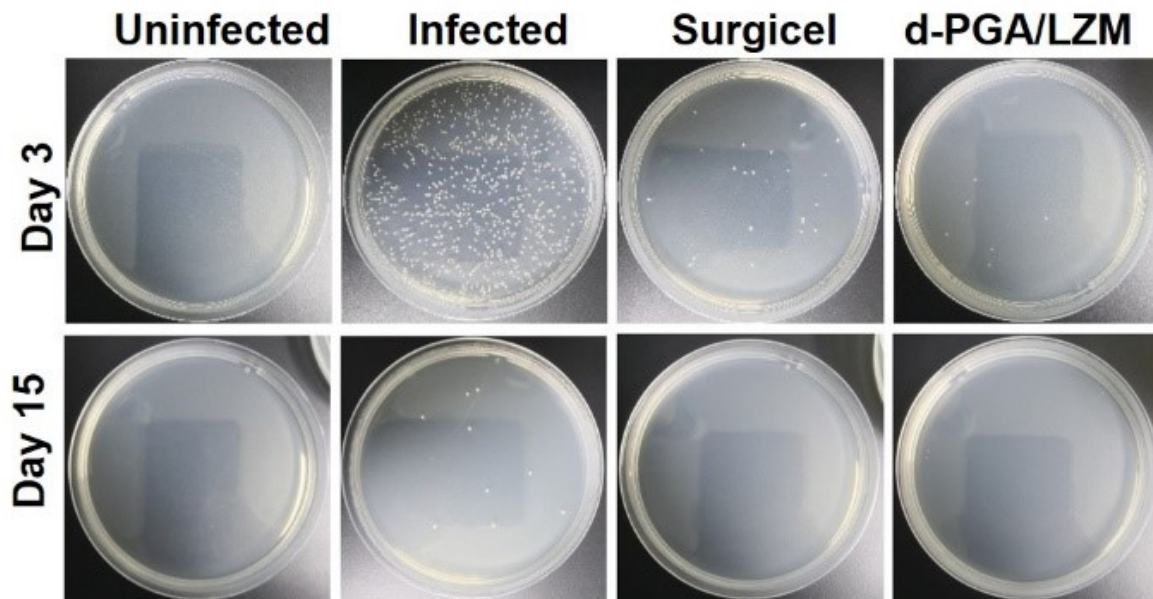

Figure S17. Photoscopic image of bacterial colony-forming units obtained from the wound tissues after day 3 and 15.

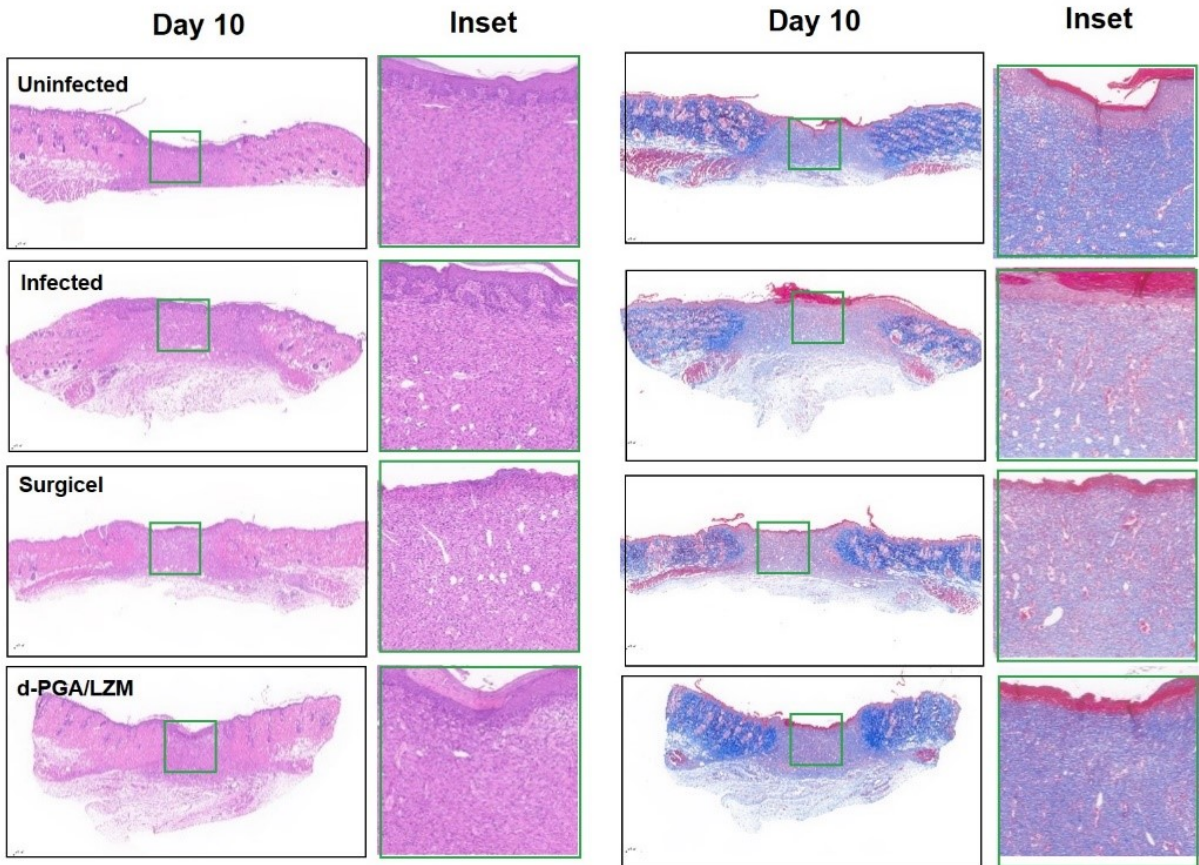

Figure S18. H&E-stained and Masson staining images of the wound tissue on day 10.
